# Supplementary material
Source: MDPI journal article supplement (https://www.mdpi.com/1999-4907/14/4/853)
Supplement: s1 [file s1]

Table S1. The interactive effects of oyster shell powder and biochar on soil chemical and biological properties.

| Indicator          | Two-way ANOVA |     |     |
|--------------------|---------------|-----|-----|
|                    | T             | B   | T×B |
| pH                 | ***           | ns  | ns  |
| SOC                | ns            | **  | ns  |
| DOC                | ns            | *** | ns  |
| TN                 | ns            | ns  | ns  |
| DN                 | ***           | ns  | *   |
| TP                 | ns            | ns  | ns  |
| AP                 | ns            | ns  | ns  |
| AK                 | ns            | ns  | ns  |
| C:N                | ns            | **  | ns  |
| C:P                | ns            | ns  | ns  |
| N:P                | ns            | ns  | ns  |
| LPI-C              | ***           | ns  | *   |
| LPII-C             | **            | ns  | ns  |
| RP-C               | ns            | *** | ns  |
| MBC                | *             | *** | **  |
| MBN                | ns            | ns  | *   |
| MBC/MBN            | ns            | *   | ns  |
| Bacterial 16s rRNA | ***           | *   | **  |

|                   |     |     |     |
|-------------------|-----|-----|-----|
| Fungal 18s rRNA   | ns  | ns  | ns  |
| Archaeal 16s rRNA | *** | ns  | ns  |
| SMR               | **  | ns  | ns  |
| SMR/SOC           | *   | **  | ns  |
| $q_{MB}$          | ns  | ns  | ns  |
| $q_{CO_2}$        | ns  | *** | ns  |
| BG                | *** | ns  | *** |
| CB                | **  | ns  | **  |
| NAG               | ns  | ns  | ns  |
| LAP               | **  | ns  | ns  |
| PHOS              | ns  | ns  | ns  |
| Enzyme C:N        | *   | ns  | ns  |
| Enzyme C:P        | *** | ns  | **  |
| Enzyme N:P        | *   | ns  | ns  |
| GMEA              | *** | ns  | *   |
| Vector length     | **  | ns  | *   |
| Vector angle      | *** | ns  | *   |
| CUE               | ns  | *   | **  |

\*,  $p < 0.05$ ; \*\*,  $p < 0.01$ ; \*\*\*,  $p < 0.001$ , ns, no significant difference.
